# Supplementary material for: Capturing patient-reported area of knee pain: a concurrent validity study using digital technology in patients with patellofemoral pain
Source: PeerJ. 2018 Mar 8;6:e4406. doi: 10.7717/peerj.4406 (PMC5845563; doi:10.7717/peerj.4406)
Supplement: Supplemental Information 1 [file peerj-06-4406-s001.xlsx]

## Sheet: Patient Demographics
Participant ID	Age	Sex	Weight (kg)	Height (cm)	BMI	Duration of symptoms (months)	Unilateral	Bilateral		EXCLUDED PAPERS
31	21	F	68.2	1.63	25.669	48	1			50
32	21	F	83.1	1.89	23.2636	108		1		43
33	32	F	67	1.8	20.679	4	1			39
34	25	M	66.5	1.72	22.4784	6	1
35	27	F	61.9	1.72	20.9235	18	1
36	19	F	78.2	1.63	29.4328	72		1
37	33	F	54.7	1.55	22.768	60		1
38	19	F	64.1	1.67	22.984	60		1
40	25	F	60	1.66	21.7738	107		1
41	26	F	65	1.76	20.984	84		1
42	19	F	54	1.69	18.9069	24	1
44	20	F	64.2	1.59	25.3946	4		1
45	21	F	68.9	1.73	23.0212	96		1
46	25	M	77.9	1.77	24.8651	2	1
47	39	M	83.1	1.84	24.5451	174		1
48	26	F	76.2	1.76	24.5997	192		1
49	27	F	94.4	1.63	35.5301	120		1
51	19	F	78	1.8	24.0741	108		1
52	28	F	64.6	1.64	24.0184	36		1
53	21	F	56.5	1.67	20.2589	56		1
54	20	F	64.2	1.55	26.7222	84		1
55	19	M	78.2	1.81	23.8698	67		1
56	34	M	76.1	1.77	24.2906	8	1
57	21	F	51.5	1.57	20.8933	60		1
58	24	F	56.1	1.65	20.6061	108		1
59	21	F	81.7	1.76	26.3753	18		1
60	39	F	59.5	1.58	23.8343	120		1
61	23	F	51.5	1.7	17.8201	120		1
62	23	F	76.5	1.83	22.8433	144		1
63	19	M	101.3	1.85	29.5982	60		1
64	23	M	69.5	1.84	20.5281	9		1
65	26	F	55.7	1.51	24.4288	52		1
Number	32						7	25
Mean	24.5312		69.0094	1.70531	23.6869	69.6562
St Dev	5.60521		12.2015	0.101122	3.42557	50.9697

## Sheet: PAPER data
Reference_Leg	total_pixel_MM			EXCLUDED PAPERS
test1	18670			50
test2	18736			43
test3	18732			39
AVG	18712.7
REF LEG	18712.7
Paper ID	Pixel_n_Paper	Pixel_%_Paper
31	282	1.50697
32	65	0.347352
33	181	0.967242
34	369	1.97189
35	400	2.13755
36	443	2.36734
37	833	4.45145
38	228	1.2184
40	650	3.47352
41	400	2.13755
42	147	0.78555
44	400	2.13755
45	776	4.14685
46	114	0.609202
47	534	2.85363
48	812	4.33923
49	737	3.93844
51	567	3.02998
52	291	1.55507						.
53	453	2.42078
54	311	1.66195
55	145	0.774862
56	239	1.27719
57	146	0.780206
58	125	0.667985
59	359	1.91845
60	166	0.887084
61	383	2.04671
62	604	3.2277
63	242	1.29322
64	65	0.347352
65	185	0.988618

## Sheet: DIGITAL data
Paper ID	Pixel_n_Digital	Pixel_%_Digital_App
31	4919	1.68
32	1306	0.45
33	1330	0.45
34	4202	1.44
35	5087	1.74
36	5767	1.97
37	12665	4.33
38	3041	1.04
40	8607	2.94
41	9501	3.24
42	3326	1.14
44	7120	2.43
45	10233	3.49
46	1391	0.48
47	8963	3.06
48	11183	3.82
49	12997	4.44
51	10351	3.54
52	5068	1.73
53	4665	1.59
54	4720	1.61
55	1761	0.6
56	2801	0.96
57	4108	1.4
58	2659	0.91
59	6145	2.1
60	2335	0.8
61	7587	2.59
62	9379	3.2
63	5352	1.83
64	1649	0.56
65	2257	0.77

## Sheet: % of area
ID	Pixel_%_Paper	Pixel_%_Digital_App
31	1.50697	1.68
32	0.347352	0.45
33	0.967242	0.45
34	1.97189	1.44
35	2.13755	1.74
36	2.36734	1.97
37	4.45145	4.33
38	1.2184	1.04
40	3.47352	2.94
41	2.13755	3.24
42	0.78555	1.14
44	2.13755	2.43
45	4.14685	3.49
46	0.609202	0.48
47	2.85363	3.06
48	4.33923	3.82
49	3.93844	4.44
51	3.02998	3.54
52	1.55507	1.73
53	2.42078	1.59
54	1.66195	1.61
55	0.774862	0.6
56	1.27719	0.96
57	0.780206	1.4
58	0.667985	0.91
59	1.91845	2.1
60	0.887084	0.8
61	2.04671	2.59
62	3.2277	3.2
63	1.29322	1.83
64	0.347352	0.56
65	0.988618	0.77
